# Supplementary material
Source: PubMed Central journal article supplement (PMC2583300)

# DENTIN MATRIX PROTEIN-1 ISOFORMS PROMOTE DIFFERENTIAL CELL ATTACHMENT AND MIGRATION

Zofia von Marschall & Larry W. Fisher

Craniofacial and Skeletal Diseases Branch, NIDCR, NIH, DHHS, Bethesda, MD

Running title: DMP1 mediates cellular response via  $\alpha V\beta 3$

Address correspondence to: Larry W. Fisher PhD, 9000 Rockville Pike, Bethesda MD 20892 USA. Phone: 301-496 5769; Fax: 301-402-0824; E-mail: lfisher@dir.nidcr.nih.gov

## Supplementary Data

### Legend to Supplementary Figure 1

Bone marrow stromal cells (BMSCs) have the capacity to add the known post-translational modifications to SIBLINGs. **A)** Chondroitinase-ABC (C-ABC, 20 mU for 2 h at 37°C) treatment of a proteoglycan-rich fraction of DMP1 $\Delta$ BMP1 (10  $\mu$ g) removed the GAG chain from the proteoglycan form (second lane, ~ 95 kDa  $M_r$  purple band) increasing its mobility to that of the full length DMP1 $\Delta$ BMP1 (~ 80 kDa  $M_r$  cyan band). Note that the digested band electrophoreses at approximately the same mobility as the non-proteoglycan DMP1 in the untreated lane. Non-treated and C-ABC-treated protein samples were electrophoresed on a reducing SDS 4-12% NuPage gel and were detected by StainsAll. **B)** Dephosphorylation of 10  $\mu$ g OPN with Antarctic Phosphatase (New England Biolabs, Ipswich, MA) changed the  $M_r$  of the StainsAll-positive band on the SDS 4-12% NuPage gel. **C)** BSP aliquots were digested for 3 days at 37° C with a series of deglycosylation enzymes (Prozyme, San Leandro, CA) to illustrate the presence of both N- and O-linked oligosaccharides. Each lane contains 5  $\mu$ g of BSP treated with: no enzymes (-); PNGase F (N); PNGase F + Sialidase A (N + SA, note the small decrease in  $M_r$  and the subtle change in color from a deeper blue (more acidic) to a cyan (less acidic) color with the removal of sialic acid); PNGase F + Sialidase A + three enzyme to remove various O-linked oligosaccharide groups,  $\beta(1-4)$ -Galactosidase +  $\beta$ -N-Acetylglucosaminidase + O-Glycanase (N + SA + O\*). Buffers and procedures were used according to the manufacture's instructions for non-denaturing conditions. The decrease in  $M_r$  on the SDS 4-12% NuPage gel caused by each addition shows that the cells can add both N- and O-linked oligosaccharides during recombinant protein synthesis. **D)** Tyrosine sulfation: Two peptides corresponding to the tyrosine-rich domain N-terminal to BSP's RGD motif [(C)<sub>T256</sub>VEYEGEYETGANEDNGYEIYSESEN<sub>282</sub>] were synthesized with and without sulfate groups covalently attached to all tyrosines (90% and 99% pure respectively). (The cysteine is not in the natural BSP sequence and was used in other experiments.) The fluorescence spectrum of the sulfated tyrosine groups in the peptide excited at 280 nm has additional emission peaks at ~335 and ~348 nm (top) that are also present in the BSP purified from the BSP-adenovirus infected BMSCs suggesting that the recombinant protein contains significant number of Tyr-sulfate as previously shown for rat BSP isolated from UMR-106 cell culture media (Midura, R. J., McQuillan, D. J., Benham, K J., Fisher, L. W., and Hascall, V. C. *J. Biol. Chem.* (1990) **265**:5285-5291).

Fluorescence analysis was kindly provided by Dr. N.S. Fedarko, Johns Hopkins University on a PTI Series M Fluorimeter (Monmouth Junction, NJ).

### **Legend to Supplementary Figure 2**

Adhesion of  $\alpha V\beta 3$  over-expressing HSG cells on DMP1 and OPN is RGD dependent and can be inhibited by a blocking anti- $\alpha V\beta 3$  antibody. Single-cell suspension of HSG cells expressing adenovirus-transduced  $\alpha V\beta 3$  integrins were plated on wells coated with DMP1, OPN, or their respective KAE variants. Noted cells were preincubated with 1 mM GRGDS competing peptide for 15 min at RT (A) or with 10  $\mu\text{g/ml}$  of an anti- $\alpha V\beta 3$  (LM609) function-blocking antibody (B and C) prior to being added to wells. Bars show the mean  $\pm$  SEM from at least 3 independent experiments, each performed in triplicate. \*\* $P < 0.001$ , \* $P < 0.01$ , as compared with IgG control by means of t-test.

# Supplementary Figure 1

## A Glycosaminoglycan

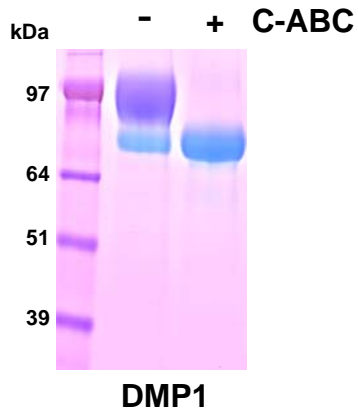

## B Phosphate

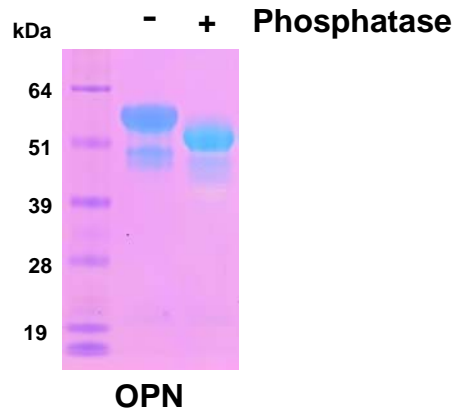

## C Oligosaccharide

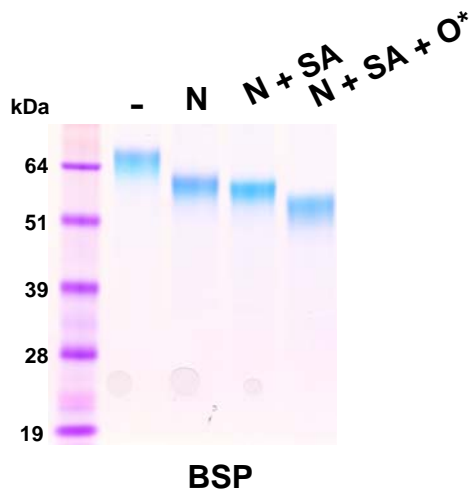

## D Tyrosine-sulfate

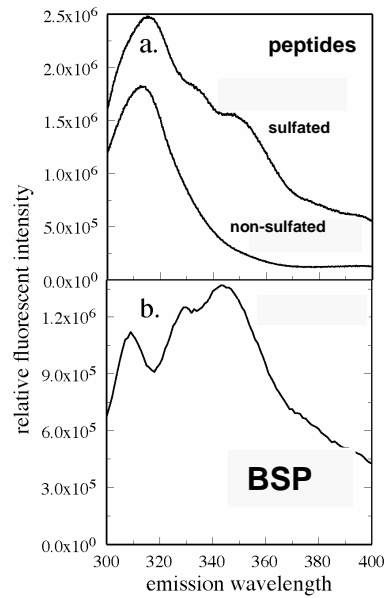

# Supplementary Figure 2

A

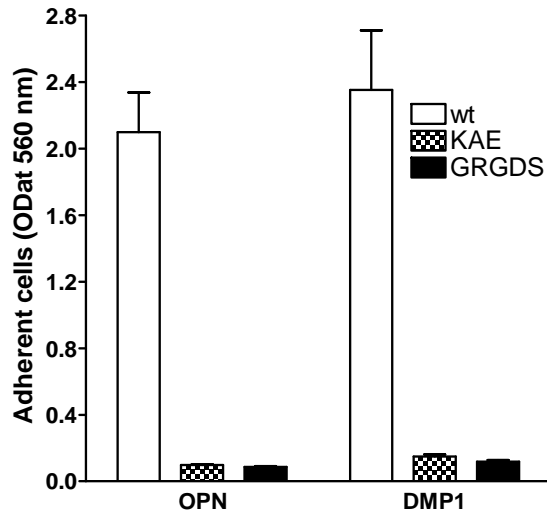

B

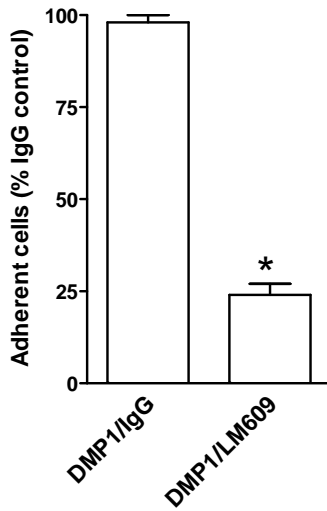

C

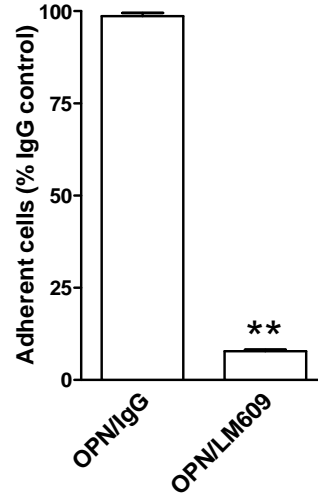

Supplement: M804283200_1.pdf [file M804283200_1.pdf]
